# Supplementary material
Source: publisher figshare collection journal article supplement (https://acs.figshare.com/ndownloader/files/10108593)
Supplement: Supplementary file 1 [file 10108593]

## Supporting information

### **Smart Nanoparticles Undergo Phase-transition for Enhanced Cellular Uptake and Subsequent Intracellular Drug Release in Tumor Microenvironment**

Guihua Ye<sup>1</sup>, Yajun Jiang<sup>1</sup>, Xiaoying Yang<sup>1</sup>, Hongxiang Hu<sup>2</sup>, Beibei Wang<sup>1</sup>, Lu Sun<sup>1</sup>, Victor C. Yang<sup>1,2</sup>, Duxin Sun<sup>2</sup>, Wei Gao<sup>1,2,\*</sup>

<sup>1</sup>Tianjin Key Laboratory on Technologies Enabling Development of Clinical Therapeutics and Diagnostics (Theranostics), School of Pharmacy, Tianjin Medical University, Tianjin 300070, PR China.

<sup>2</sup>University of Michigan, College of Pharmacy, 428 Church St, Ann Arbor, MI 48108, USA.

\*Corresponding author: Wei Gao

E-mail: weiga@umich.edu; Tel/Fax: 17347735423

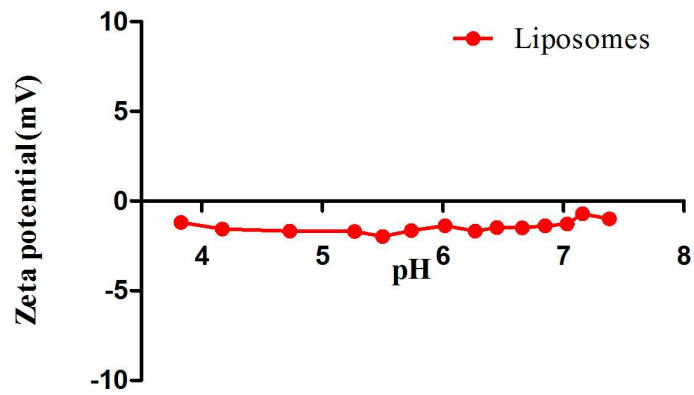

**Figure S1** Zeta potential of DOX loaded PEGylated liposome at different pH.
